# Supplementary material for: An Analysis of Genetic Changes during the Divergence of Drosophila Species
Source: PubMed Central journal article supplement (PMC2864749; doi:10.1371/journal.pone.0010485), 2010-05-05
Supplement: pone.0010485.s001.pdf [file pone.0010485.s001.pdf]

| GENE     | GO BIOLOGICAL PROCESS                                                                                                                                                                                                                          |
|----------|------------------------------------------------------------------------------------------------------------------------------------------------------------------------------------------------------------------------------------------------|
| CG32816  | biological_process   no biological data available                                                                                                                                                                                              |
| CG13369  | D-ribose metabolic process   inferred from electronic annotation with InterPro:IPR002139                                                                                                                                                       |
| CG13362  | -                                                                                                                                                                                                                                              |
| CG14635  | -                                                                                                                                                                                                                                              |
| CG14633  | -                                                                                                                                                                                                                                              |
| ThiA-5-2 | transcription initiation from RNA polymerase II promoter   inferred from sequence or structural similarity with HGNC_gene:GTF2A2; HGNC:4647; OMIM:600519 AND inferred from sequence or structural similarity with SGD_LOCUS:TOA2; SGD:S0001541 |
| CG14631  | regulation of transcription from RNA polymerase II promoter   non-traceable author statement                                                                                                                                                   |
| CG33082  | -                                                                                                                                                                                                                                              |
| CG11381  | -                                                                                                                                                                                                                                              |
| CG14781  | mitotic spindle elongation   inferred from mutant phenotype                                                                                                                                                                                    |
| CG32810  | ion transport   inferred from sequence or structural similarity with NCBI_NP:508239                                                                                                                                                            |
| CG32803  | potassium ion transport   inferred from electronic annotation with InterPro:IPR003131                                                                                                                                                          |
| CG3857   | -                                                                                                                                                                                                                                              |
| CG4325   | -                                                                                                                                                                                                                                              |
| CG14054  | -                                                                                                                                                                                                                                              |
| CG4061   | RNA processing   inferred from electronic annotation with InterPro:IPR013791, InterPro:IPR017770                                                                                                                                               |
| CG3391   | transport   inferred from electronic annotation with InterPro:IPR01071                                                                                                                                                                         |
| CG2882   | -                                                                                                                                                                                                                                              |
| CG10793  | response to oxidative stress   inferred from electronic annotation with InterPro:IPR002016                                                                                                                                                     |
| CG14269  | -                                                                                                                                                                                                                                              |
| CG16782  | -                                                                                                                                                                                                                                              |
| Mnt      | regulation of transcription   inferred from sequence or structural similarity with dm                                                                                                                                                          |
|          | phagocytosis_enquilmnt   inferred from mutant phenotype                                                                                                                                                                                        |
| CG15671  | -                                                                                                                                                                                                                                              |
| CG15676  | -                                                                                                                                                                                                                                              |
| CG15677  | -                                                                                                                                                                                                                                              |
| CG15786  | -                                                                                                                                                                                                                                              |
| CG15768  | proteolysis   inferred from electronic annotation with InterPro:IPR000209, InterPro:IPR000834                                                                                                                                                  |
| CG15764  | -                                                                                                                                                                                                                                              |
| CG12236  | -                                                                                                                                                                                                                                              |
| CG8041   | proteolysis   inferred from electronic annotation with InterPro:IPR001254, InterPro:IPR001314, InterPro:IPR018114                                                                                                                              |
| CG17171  | -                                                                                                                                                                                                                                              |
| CG3226   | -                                                                                                                                                                                                                                              |
| CG4575   | regulation of transcription_DNA-dependent   inferred from electronic annotation with InterPro:IPR004827, InterPro:IPR011700                                                                                                                    |
| inx7     | -                                                                                                                                                                                                                                              |
| CG1999   | -                                                                                                                                                                                                                                              |
| CG15330  | -                                                                                                                                                                                                                                              |
| CG2256   | -                                                                                                                                                                                                                                              |
| CG2147   | -                                                                                                                                                                                                                                              |
| CG12661  | -                                                                                                                                                                                                                                              |
| CG10970  | -                                                                                                                                                                                                                                              |
| Dipt     | -                                                                                                                                                                                                                                              |
| CG12057  | -                                                                                                                                                                                                                                              |
| CG34339  | -                                                                                                                                                                                                                                              |
| CG15317  | -                                                                                                                                                                                                                                              |
| Gaa      | post-Golgi vesicle-mediated transport   inferred from sequence or structural similarity with UniProtKB_Q9UJY5, UniProt_Q9UJY4, UniProt_Q9NZ52                                                                                                  |
|          | intracellular protein transport   inferred from electronic annotation with InterPro:IPR002014, InterPro:IPR004152, InterPro:IPR008152, InterPro:IPR013041                                                                                      |
| CG1791   | signal transduction   inferred from electronic annotation with InterPro:IPR002181, InterPro:IPR014716                                                                                                                                          |
| Slp      | -                                                                                                                                                                                                                                              |
| l11G0289 | -                                                                                                                                                                                                                                              |
| CG2888   | -                                                                                                                                                                                                                                              |
| RaxX2    | regulation of transcription_DNA-dependent   inferred from electronic annotation with InterPro:IPR002078                                                                                                                                        |
|          | small GTPase mediated signal transduction   inferred from electronic annotation with InterPro:IPR001806, InterPro:IPR003579                                                                                                                    |
|          | protein transport   inferred from electronic annotation with InterPro:IPR003579                                                                                                                                                                |
| CG15296  | -                                                                                                                                                                                                                                              |
| CG2124   | -                                                                                                                                                                                                                                              |
| CG12637  | -                                                                                                                                                                                                                                              |
| CG15209  | -                                                                                                                                                                                                                                              |
| CG17333  | pentose-phosphate shunt   non-traceable author statement                                                                                                                                                                                       |
| CG11106  | -                                                                                                                                                                                                                                              |
| CG11756  | -                                                                                                                                                                                                                                              |
| CG1738   | -                                                                                                                                                                                                                                              |
| CG9360   | metabolic process   inferred from electronic annotation with InterPro:IPR002198, InterPro:IPR002347, InterPro:IPR016040                                                                                                                        |
| CG15739  | metabolic process   inferred from electronic annotation with InterPro:IPR005834, InterPro:IPR006357                                                                                                                                            |
| CG11366  | -                                                                                                                                                                                                                                              |
| CG15925  | -                                                                                                                                                                                                                                              |
| CG1463   | -                                                                                                                                                                                                                                              |
| CG2543   | nitrohydroxyglycylutamate biosynthetic process   inferred from sequence or structural similarity with UniProtKB_Q05932                                                                                                                         |
| mRpl49   | translational initiation   inferred from electronic annotation with InterPro:IPR001950                                                                                                                                                         |
| CG32643  | -                                                                                                                                                                                                                                              |
| CG4351   | -                                                                                                                                                                                                                                              |
| CG15747  | -                                                                                                                                                                                                                                              |
| CG12725  | protein modification process   inferred from electronic annotation with InterPro:IPR000626                                                                                                                                                     |
| CG12481  | -                                                                                                                                                                                                                                              |
| CG13403  | -                                                                                                                                                                                                                                              |
| CG12540  | -                                                                                                                                                                                                                                              |
| nmdyn-D6 | GTP biosynthetic process   inferred from electronic annotation with InterPro:IPR001564                                                                                                                                                         |
|          | UTP biosynthetic process   inferred from electronic annotation with InterPro:IPR001564                                                                                                                                                         |
|          | GTP biosynthetic process   inferred from electronic annotation with InterPro:IPR001564                                                                                                                                                         |
| CG15641  | transport   inferred from electronic annotation with InterPro:IPR001588                                                                                                                                                                        |
| CG15801  | -                                                                                                                                                                                                                                              |
| CG12395  | -                                                                                                                                                                                                                                              |
| CG34015  | biological_process   no biological data available                                                                                                                                                                                              |
| CG4653   | proteolysis   inferred from electronic annotation with InterPro:IPR001254, InterPro:IPR001314, InterPro:IPR018114                                                                                                                              |
| CG4789   | regulation of transcription_DNA-dependent   inferred from electronic annotation with InterPro:IPR002078                                                                                                                                        |
| CG13004  | -                                                                                                                                                                                                                                              |
| CG4955   | -                                                                                                                                                                                                                                              |
| CG18258  | lipid metabolic process   inferred from electronic annotation with InterPro:IPR000734                                                                                                                                                          |
| CG8915   | -                                                                                                                                                                                                                                              |
| CG8408   | biological_process   no biological data available                                                                                                                                                                                              |
| CG12672  | -                                                                                                                                                                                                                                              |
| Her      | negative regulation of transcription from RNA polymerase II promoter   inferred from sequence or structural similarity with MGD_Hes1; MGI:MGI:104853                                                                                           |
| CG15043  | -                                                                                                                                                                                                                                              |
| CG15047  | -                                                                                                                                                                                                                                              |
| CG6873   | -                                                                                                                                                                                                                                              |
| CG34329  | -                                                                                                                                                                                                                                              |
| CG1504   | -                                                                                                                                                                                                                                              |
| Obp19a   | olfactory behavior   inferred from sequence or structural similarity with UniProtKB_Q02372                                                                                                                                                     |
|          | response to pheromone   inferred from sequence or structural similarity with UniProtKB_Q02372                                                                                                                                                  |
|          | sensory perception of chemical stimulus   inferred from sequence or structural similarity with UniProtKB_P34174                                                                                                                                |
|          | transport   inferred from electronic annotation with InterPro:IPR006170                                                                                                                                                                        |
| CG1324   | -                                                                                                                                                                                                                                              |
| CG1304   | proteolysis   non-traceable author statement                                                                                                                                                                                                   |
| CG1722   | -                                                                                                                                                                                                                                              |
| CG41106  | biological_process   no biological data available                                                                                                                                                                                              |
| FucTC    | protein amino acid glycosylation   inferred from electronic annotation with InterPro:IPR001503                                                                                                                                                 |
| Rab21    | small GTPase mediated signal transduction   inferred from electronic annotation with InterPro:IPR001806, InterPro:IPR003579                                                                                                                    |
|          | protein transport   inferred from electronic annotation with InterPro:IPR003579                                                                                                                                                                |
| CG13865  | biological_process   no biological data available                                                                                                                                                                                              |
