# Supplementary material for: An Analysis of Genetic Changes during the Divergence of Drosophila Species
Source: PubMed Central journal article supplement (PMC2864749; doi:10.1371/journal.pone.0010485), 2010-05-05
Supplement: pone.0010485.s002.pdf [file pone.0010485.s002.pdf]

| GENE                        | GO BIOLOGICAL PROCESS                                                                                                                                                                                                                                                                                                                                                                                 |
|-----------------------------|-------------------------------------------------------------------------------------------------------------------------------------------------------------------------------------------------------------------------------------------------------------------------------------------------------------------------------------------------------------------------------------------------------|
| <a href="#">Iris</a>        | <a href="#">oogenesis</a>   <a href="#">non-traceable author statement</a>                                                                                                                                                                                                                                                                                                                            |
| <a href="#">CG17650</a>     | -                                                                                                                                                                                                                                                                                                                                                                                                     |
| <a href="#">CG7295</a>      | -                                                                                                                                                                                                                                                                                                                                                                                                     |
| <a href="#">CG33673</a>     | <a href="#">biological process</a>   <a href="#">no biological data available</a>                                                                                                                                                                                                                                                                                                                     |
| <a href="#">Obp22a</a>      | <a href="#">sensory perception of chemical stimulus</a>   <a href="#">inferred from sequence or structural similarity with UniProtKB:P34174</a><br><a href="#">transport</a>   <a href="#">inferred from electronic annotation with InterPro:IPR006170</a>                                                                                                                                            |
| <a href="#">CG12674</a>     | -                                                                                                                                                                                                                                                                                                                                                                                                     |
| <a href="#">CG4259</a>      | <a href="#">proteolysis</a>   <a href="#">inferred from electronic annotation with InterPro:IPR001254</a>                                                                                                                                                                                                                                                                                             |
| <a href="#">CG17239</a>     | <a href="#">proteolysis</a>   <a href="#">non-traceable author statement</a>                                                                                                                                                                                                                                                                                                                          |
| <a href="#">CG31949</a>     | <a href="#">biological process</a>   <a href="#">no biological data available</a>                                                                                                                                                                                                                                                                                                                     |
| <a href="#">CG3515</a>      | <a href="#">biological process</a>   <a href="#">no biological data available</a>                                                                                                                                                                                                                                                                                                                     |
| <a href="#">CG33125</a>     | <a href="#">biological process</a>   <a href="#">no biological data available</a>                                                                                                                                                                                                                                                                                                                     |
| <a href="#">CG17301</a>     | <a href="#">ubiquitin-dependent protein catabolic process</a>   <a href="#">inferred from sequence or structural similarity with UniProtKB:P40307</a>                                                                                                                                                                                                                                                 |
| <a href="#">CG15398</a>     | <a href="#">regulation of transcription, DNA-dependent</a>   <a href="#">inferred from electronic annotation with InterPro:IPR000814</a><br><a href="#">transcription initiation from RNA polymerase II promoter</a>   <a href="#">inferred from electronic annotation with InterPro:IPR000814</a>                                                                                                    |
| <a href="#">CG9641</a>      | -                                                                                                                                                                                                                                                                                                                                                                                                     |
| <a href="#">CG17261</a>     | -                                                                                                                                                                                                                                                                                                                                                                                                     |
| <a href="#">CG8838</a>      | -                                                                                                                                                                                                                                                                                                                                                                                                     |
| <a href="#">CG31776</a>     | <a href="#">oligosaccharide biosynthetic process</a>   <a href="#">inferred from direct assay</a>                                                                                                                                                                                                                                                                                                     |
| <a href="#">lectin-24A</a>  | -                                                                                                                                                                                                                                                                                                                                                                                                     |
| Umbrea - unknown ID         |                                                                                                                                                                                                                                                                                                                                                                                                       |
| <a href="#">Jon25Bii</a>    | <a href="#">proteolysis</a>   <a href="#">non-traceable author statement</a>                                                                                                                                                                                                                                                                                                                          |
| <a href="#">CG13989</a>     | -                                                                                                                                                                                                                                                                                                                                                                                                     |
| <a href="#">CG31633</a>     | -                                                                                                                                                                                                                                                                                                                                                                                                     |
| <a href="#">r2d2</a>        | <a href="#">RNA interference, siRNA loading onto RISC</a>   <a href="#">inferred from direct assay</a><br><a href="#">defense response to virus</a>   <a href="#">inferred from mutant phenotype</a>                                                                                                                                                                                                  |
| <a href="#">CG33121</a>     | -                                                                                                                                                                                                                                                                                                                                                                                                     |
| <a href="#">Acp29AB</a>     | <a href="#">sperm displacement</a>   <a href="#">non-traceable author statement</a><br><a href="#">sperm competition</a>   <a href="#">traceable author statement</a><br><a href="#">post-mating behavior</a>   <a href="#">non-traceable author statement</a>                                                                                                                                        |
| <a href="#">lectin-29Ca</a> | -                                                                                                                                                                                                                                                                                                                                                                                                     |
| <a href="#">CG31898</a>     | <a href="#">biological process</a>   <a href="#">no biological data available</a>                                                                                                                                                                                                                                                                                                                     |
| <a href="#">CG13088</a>     | -                                                                                                                                                                                                                                                                                                                                                                                                     |
| <a href="#">CG9573</a>      | -                                                                                                                                                                                                                                                                                                                                                                                                     |
| <a href="#">CG4438</a>      | -                                                                                                                                                                                                                                                                                                                                                                                                     |
| <a href="#">CG31882</a>     | <a href="#">biological process</a>   <a href="#">no biological data available</a>                                                                                                                                                                                                                                                                                                                     |
| <a href="#">CG18854</a>     | -                                                                                                                                                                                                                                                                                                                                                                                                     |
| <a href="#">CG34043</a>     | <a href="#">biological process</a>   <a href="#">no biological data available</a>                                                                                                                                                                                                                                                                                                                     |
| <a href="#">CG7300</a>      | -                                                                                                                                                                                                                                                                                                                                                                                                     |
| <a href="#">CG6444</a>      | -                                                                                                                                                                                                                                                                                                                                                                                                     |
| <a href="#">Vm32E</a>       | <a href="#">vitelline membrane formation in chorion-containing eggshell</a>   <a href="#">non-traceable author statement</a>                                                                                                                                                                                                                                                                          |
| <a href="#">CG14926</a>     | -                                                                                                                                                                                                                                                                                                                                                                                                     |
| <a href="#">CG6555</a>      | -                                                                                                                                                                                                                                                                                                                                                                                                     |
| <a href="#">CG14944</a>     | <a href="#">cyclic nucleotide metabolic process</a>   <a href="#">inferred from sequence or structural similarity with UniProtKB:Q63421</a><br><a href="#">regulation of proteolysis</a>   <a href="#">inferred from sequence or structural similarity with UniProtKB:P34953</a><br><a href="#">signal transduction</a>   <a href="#">inferred from electronic annotation with InterPro:IPR002073</a> |
| <a href="#">CG12314</a>     | -                                                                                                                                                                                                                                                                                                                                                                                                     |
| <a href="#">CG14947</a>     | -                                                                                                                                                                                                                                                                                                                                                                                                     |
| <a href="#">Pkd2</a>        | <a href="#">sperm competition</a>   <a href="#">inferred from mutant phenotype</a><br><a href="#">sperm motility</a>   <a href="#">inferred from mutant phenotype</a><br><a href="#">larval feeding behavior</a>   <a href="#">inferred from mutant phenotype</a>                                                                                                                                     |

|                         |                                                                                                                                                                                                                                                                                                            |
|-------------------------|------------------------------------------------------------------------------------------------------------------------------------------------------------------------------------------------------------------------------------------------------------------------------------------------------------|
|                         | <a href="#">smooth muscle contraction</a>   <a href="#">inferred from mutant phenotype</a>                                                                                                                                                                                                                 |
| <a href="#">CG31858</a> | <a href="#">biological process</a>   <a href="#">no biological data available</a>                                                                                                                                                                                                                          |
| <a href="#">ref2</a>    | <a href="#">mRNA export from nucleus</a>   <a href="#">non-traceable author statement</a>                                                                                                                                                                                                                  |
| <a href="#">Pk34A</a>   | <a href="#">protein amino acid phosphorylation</a>   <a href="#">inferred from sequence or structural similarity</a>                                                                                                                                                                                       |
| <a href="#">CG16957</a> | -                                                                                                                                                                                                                                                                                                          |
| <a href="#">CG16956</a> | -                                                                                                                                                                                                                                                                                                          |
| <a href="#">CG16852</a> | -                                                                                                                                                                                                                                                                                                          |
| <a href="#">CG31845</a> | <a href="#">biological process</a>   <a href="#">no biological data available</a>                                                                                                                                                                                                                          |
| <a href="#">CG16888</a> | -                                                                                                                                                                                                                                                                                                          |
| <a href="#">He</a>      | <a href="#">innate immune response</a>   <a href="#">inferred from mutant phenotype</a><br><a href="#">encapsulation of foreign target</a>   <a href="#">traceable author statement</a><br><a href="#">negative regulation of lamellocyte differentiation</a>   <a href="#">traceable author statement</a> |
| <a href="#">CG33681</a> | <a href="#">biological process</a>   <a href="#">no biological data available</a>                                                                                                                                                                                                                          |
| <a href="#">CG15293</a> | -                                                                                                                                                                                                                                                                                                          |
| <a href="#">CG31769</a> | <a href="#">biological process</a>   <a href="#">no biological data available</a>                                                                                                                                                                                                                          |
| <a href="#">CG15286</a> | -                                                                                                                                                                                                                                                                                                          |
| <a href="#">CG18125</a> | <a href="#">proteolysis</a>   <a href="#">inferred from electronic annotation with InterPro:IPR001254, InterPro:IPR001314, InterPro:IPR018114</a>                                                                                                                                                          |
| <a href="#">CG15262</a> | <a href="#">regulation of transcription</a>   <a href="#">inferred from electronic annotation with InterPro:IPR007282</a>                                                                                                                                                                                  |
| <a href="#">CG18063</a> | -                                                                                                                                                                                                                                                                                                          |
| <a href="#">CG17329</a> | -                                                                                                                                                                                                                                                                                                          |
| <a href="#">CG31737</a> | -                                                                                                                                                                                                                                                                                                          |
| <a href="#">CG4631</a>  | -                                                                                                                                                                                                                                                                                                          |
| <a href="#">squ</a>     | <a href="#">dorsal appendage formation</a>   <a href="#">inferred from mutant phenotype</a><br><a href="#">oogenesis</a>   <a href="#">inferred from mutant phenotype</a>                                                                                                                                  |
| <a href="#">CG33552</a> | <a href="#">biological process</a>   <a href="#">no biological data available</a>                                                                                                                                                                                                                          |
| <a href="#">CG12620</a> | <a href="#">regulation of phosphoprotein phosphatase activity</a>   <a href="#">inferred from electronic annotation with InterPro:IPR007062</a><br><a href="#">regulation of signal transduction</a>   <a href="#">inferred from electronic annotation with InterPro:IPR007062</a>                         |
| <a href="#">CG31804</a> | <a href="#">biological process</a>   <a href="#">no biological data available</a>                                                                                                                                                                                                                          |
| <a href="#">CG15172</a> | -                                                                                                                                                                                                                                                                                                          |
| <a href="#">CG17344</a> | -                                                                                                                                                                                                                                                                                                          |
| <a href="#">CG17549</a> | -                                                                                                                                                                                                                                                                                                          |
| <a href="#">CG34051</a> | <a href="#">biological process</a>   <a href="#">no biological data available</a>                                                                                                                                                                                                                          |
| <a href="#">CG16772</a> | -                                                                                                                                                                                                                                                                                                          |
| <a href="#">CG15475</a> | -                                                                                                                                                                                                                                                                                                          |
| <a href="#">CG31601</a> | <a href="#">biological process</a>   <a href="#">no biological data available</a>                                                                                                                                                                                                                          |
| <a href="#">CG5922</a>  | -                                                                                                                                                                                                                                                                                                          |
