# Supplementary material for: An Analysis of Genetic Changes during the Divergence of Drosophila Species
Source: PubMed Central journal article supplement (PMC2864749; doi:10.1371/journal.pone.0010485), 2010-05-05
Supplement: pone.0010485.s003.pdf [file pone.0010485.s003.pdf]

| GENE                      | GO BIOLOGICAL PROCESS                                                                                                                                                                                                                                                                                                                                                                                                                                                                                           |
|---------------------------|-----------------------------------------------------------------------------------------------------------------------------------------------------------------------------------------------------------------------------------------------------------------------------------------------------------------------------------------------------------------------------------------------------------------------------------------------------------------------------------------------------------------|
| <a href="#">CG30432</a>   | <a href="#">biological process</a>   no biological data available                                                                                                                                                                                                                                                                                                                                                                                                                                               |
| <a href="#">CG15234</a>   | -                                                                                                                                                                                                                                                                                                                                                                                                                                                                                                               |
| <a href="#">CG9445</a>    | <a href="#">mesoderm development</a>   inferred from expression pattern                                                                                                                                                                                                                                                                                                                                                                                                                                         |
| <a href="#">Tsp42Ee</a>   | -                                                                                                                                                                                                                                                                                                                                                                                                                                                                                                               |
| <a href="#">CG11112</a>   | -                                                                                                                                                                                                                                                                                                                                                                                                                                                                                                               |
| <a href="#">CG8712</a>    | -                                                                                                                                                                                                                                                                                                                                                                                                                                                                                                               |
| <a href="#">coilin</a>    | -                                                                                                                                                                                                                                                                                                                                                                                                                                                                                                               |
| <a href="#">CG30374</a>   | <a href="#">proteolysis</a>   inferred from electronic annotation with InterPro:IPR001254                                                                                                                                                                                                                                                                                                                                                                                                                       |
| <a href="#">CG14756</a>   | -                                                                                                                                                                                                                                                                                                                                                                                                                                                                                                               |
| <a href="#">CG14759</a>   | -                                                                                                                                                                                                                                                                                                                                                                                                                                                                                                               |
| <a href="#">CG34219</a>   | -                                                                                                                                                                                                                                                                                                                                                                                                                                                                                                               |
| <a href="#">CG8237</a>    | -                                                                                                                                                                                                                                                                                                                                                                                                                                                                                                               |
| <a href="#">CG8229</a>    | -                                                                                                                                                                                                                                                                                                                                                                                                                                                                                                               |
| <a href="#">CG13742</a>   | -                                                                                                                                                                                                                                                                                                                                                                                                                                                                                                               |
| <a href="#">CG30008</a>   | -                                                                                                                                                                                                                                                                                                                                                                                                                                                                                                               |
| <a href="#">CG30017</a>   | <a href="#">biological process</a>   no biological data available                                                                                                                                                                                                                                                                                                                                                                                                                                               |
| <a href="#">Obp47a</a>    | <a href="#">sensory perception of chemical stimulus</a>   inferred from sequence or structural similarity with UniProtKB:P34174<br><a href="#">transport</a>   inferred from electronic annotation with InterPro:IPR006170                                                                                                                                                                                                                                                                                      |
| <a href="#">CG34224</a>   | -                                                                                                                                                                                                                                                                                                                                                                                                                                                                                                               |
| <a href="#">Cpr47Eg</a>   | <a href="#">transport</a>   inferred from electronic annotation with InterPro:IPR001588                                                                                                                                                                                                                                                                                                                                                                                                                         |
| <a href="#">CG13190</a>   | <a href="#">biological process</a>   no biological data available                                                                                                                                                                                                                                                                                                                                                                                                                                               |
| <a href="#">CG13159</a>   | -                                                                                                                                                                                                                                                                                                                                                                                                                                                                                                               |
| <a href="#">CG33792</a>   | <a href="#">biological process</a>   no biological data available                                                                                                                                                                                                                                                                                                                                                                                                                                               |
| <a href="#">CG4616</a>    | -                                                                                                                                                                                                                                                                                                                                                                                                                                                                                                               |
| <a href="#">CG4716</a>    | -                                                                                                                                                                                                                                                                                                                                                                                                                                                                                                               |
| <a href="#">CG17048</a>   | -                                                                                                                                                                                                                                                                                                                                                                                                                                                                                                               |
| <a href="#">CG17050</a>   | -                                                                                                                                                                                                                                                                                                                                                                                                                                                                                                               |
| <a href="#">CG17049</a>   | -                                                                                                                                                                                                                                                                                                                                                                                                                                                                                                               |
| <a href="#">CG34236</a>   | -                                                                                                                                                                                                                                                                                                                                                                                                                                                                                                               |
| <a href="#">CG8589</a>    | -                                                                                                                                                                                                                                                                                                                                                                                                                                                                                                               |
| <a href="#">CG10102</a>   | -                                                                                                                                                                                                                                                                                                                                                                                                                                                                                                               |
| <a href="#">CG12857</a>   | -                                                                                                                                                                                                                                                                                                                                                                                                                                                                                                               |
| <a href="#">Cyp6a21</a>   | -                                                                                                                                                                                                                                                                                                                                                                                                                                                                                                               |
| <a href="#">CG30472</a>   | <a href="#">biological process</a>   no biological data available                                                                                                                                                                                                                                                                                                                                                                                                                                               |
| <a href="#">CG30466</a>   | <a href="#">biological process</a>   no biological data available                                                                                                                                                                                                                                                                                                                                                                                                                                               |
| <a href="#">CG30090</a>   | <a href="#">proteolysis</a>   inferred from electronic annotation with InterPro:IPR001254, InterPro:IPR001314, InterPro:IPR018114                                                                                                                                                                                                                                                                                                                                                                               |
| <a href="#">CG33460</a>   | -                                                                                                                                                                                                                                                                                                                                                                                                                                                                                                               |
| <a href="#">CG30099</a>   | -                                                                                                                                                                                                                                                                                                                                                                                                                                                                                                               |
| <a href="#">CG15710</a>   | -                                                                                                                                                                                                                                                                                                                                                                                                                                                                                                               |
| <a href="#">CG15711</a>   | -                                                                                                                                                                                                                                                                                                                                                                                                                                                                                                               |
| <a href="#">CG33459</a>   | <a href="#">proteolysis</a>   inferred from electronic annotation with InterPro:IPR001254, InterPro:IPR001314, InterPro:IPR018114                                                                                                                                                                                                                                                                                                                                                                               |
| <a href="#">CG4927</a>    | <a href="#">proteolysis</a>   non-traceable author statement                                                                                                                                                                                                                                                                                                                                                                                                                                                    |
| <a href="#">Acp53C14c</a> | -                                                                                                                                                                                                                                                                                                                                                                                                                                                                                                               |
| <a href="#">tef</a>       | <a href="#">male meiosis I</a>   inferred from mutant phenotype<br><a href="#">synapsis</a>   non-traceable author statement<br><a href="#">male meiosis chromosome segregation</a>   inferred from mutant phenotype                                                                                                                                                                                                                                                                                            |
| <a href="#">CG11400</a>   | -                                                                                                                                                                                                                                                                                                                                                                                                                                                                                                               |
| <a href="#">CG15917</a>   | -                                                                                                                                                                                                                                                                                                                                                                                                                                                                                                               |
| <a href="#">CG10950</a>   | <a href="#">protein import into nucleus</a>   inferred from sequence or structural similarity with SGD_LOCUS:MTR10; SGD:S0005686                                                                                                                                                                                                                                                                                                                                                                                |
| <a href="#">Lhr</a>       | -                                                                                                                                                                                                                                                                                                                                                                                                                                                                                                               |
| <a href="#">CG34192</a>   | -                                                                                                                                                                                                                                                                                                                                                                                                                                                                                                               |
| <a href="#">CG6520</a>    | -                                                                                                                                                                                                                                                                                                                                                                                                                                                                                                               |
| <a href="#">Dcr-2</a>     | <a href="#">RNA interference</a>   inferred from direct assay<br><a href="#">RNA interference, production of siRNA</a>   inferred from direct assay<br><a href="#">RNA interference, siRNA loading onto RISC</a>   inferred from mutant phenotype<br><a href="#">RNA interference, targeting of mRNA for destruction</a>   inferred from mutant phenotype<br><a href="#">chromatin silencing</a>   inferred from mutant phenotype<br><a href="#">defense response to virus</a>   inferred from mutant phenotype |

|                            |                                                                                                                                                                                                                             |
|----------------------------|-----------------------------------------------------------------------------------------------------------------------------------------------------------------------------------------------------------------------------|
| <a href="#">CG18186</a>    | <a href="#">chromatin assembly or disassembly   inferred from electronic annotation with InterPro:IPR000953</a>                                                                                                             |
| <a href="#">CG10934</a>    | -                                                                                                                                                                                                                           |
| <a href="#">CG10931</a>    | -                                                                                                                                                                                                                           |
| <a href="#">PpY-55A</a>    | <a href="#">protein amino acid dephosphorylation   inferred from sequence or structural similarity</a>                                                                                                                      |
| <a href="#">CG14502</a>    | -                                                                                                                                                                                                                           |
| <a href="#">l(2)08717</a>  | <a href="#">wing disc dorsal/ventral pattern formation   inferred from genetic interaction with Bx, ap</a>                                                                                                                  |
| <a href="#">CG18605</a>    | -                                                                                                                                                                                                                           |
| <a href="#">CG7137</a>     | -                                                                                                                                                                                                                           |
| <a href="#">CG15124</a>    | -                                                                                                                                                                                                                           |
| <a href="#">CklIbeta2</a>  | <a href="#">protein amino acid phosphorylation   inferred from sequence or structural similarity</a>                                                                                                                        |
| <a href="#">CG13871</a>    | -                                                                                                                                                                                                                           |
| <a href="#">CG15657</a>    | -                                                                                                                                                                                                                           |
| <a href="#">CG30391</a>    | -                                                                                                                                                                                                                           |
| <a href="#">CG30283</a>    | <a href="#">proteolysis   inferred from electronic annotation with InterPro:IPR001254, InterPro:IPR001314, InterPro:IPR018114</a>                                                                                           |
| <a href="#">comr</a>       | <a href="#">positive regulation of transcription from RNA polymerase II promoter   inferred from mutant phenotype</a><br><a href="#">spermatogenesis   inferred from mutant phenotype</a>                                   |
| <a href="#">CG11362</a>    | -                                                                                                                                                                                                                           |
| <a href="#">CG4294</a>     | <a href="#">phosphate metabolic process   inferred from electronic annotation with InterPro:IPR008162</a>                                                                                                                   |
| <a href="#">CG13512</a>    | <a href="#">biological process   no biological data available</a>                                                                                                                                                           |
| <a href="#">CG30270</a>    | -                                                                                                                                                                                                                           |
| <a href="#">CG30187</a>    | <a href="#">proteolysis   inferred from electronic annotation with InterPro:IPR001254, InterPro:IPR001314, InterPro:IPR018114</a>                                                                                           |
| <a href="#">CG32833</a>    | <a href="#">proteolysis   inferred from electronic annotation with InterPro:IPR001254</a>                                                                                                                                   |
| <a href="#">Gr59d</a>      | <a href="#">sensory perception of taste   inferred from sequence or structural similarity</a>                                                                                                                               |
| <a href="#">Klp59C</a>     | <a href="#">mitotic sister chromatid segregation   inferred from mutant phenotype</a><br><a href="#">microtubule-based movement   inferred from sequence or structural similarity with EMBL:Y15894; protein_id:CAA75815</a> |
| <a href="#">CG3162</a>     | <a href="#">nuclear mRNA splicing, via spliceosome   inferred from sequence or structural similarity with UniProtKB:P26369</a>                                                                                              |
| <a href="#">Rpl22-like</a> | <a href="#">translation   inferred from sequence or structural similarity with HGNC_gene:RPL22; HGNC:10315; OMIM:180474</a>                                                                                                 |
| <a href="#">CG12782</a>    | <a href="#">poly(A)+ mRNA export from nucleus   inferred from sequence or structural similarity with UniProtKB:P41838</a>                                                                                                   |
| <a href="#">CG13541</a>    | -                                                                                                                                                                                                                           |
| <a href="#">CG9863</a>     | -                                                                                                                                                                                                                           |
| <a href="#">CG30409</a>    | -                                                                                                                                                                                                                           |
| <a href="#">CG13557</a>    | -                                                                                                                                                                                                                           |
| <a href="#">CG13559</a>    | -                                                                                                                                                                                                                           |
| <a href="#">Gr59f</a>      | <a href="#">sensory perception of taste   inferred from sequence or structural similarity</a>                                                                                                                               |
| <a href="#">IM18</a>       | <a href="#">defense response   inferred from direct assay</a>                                                                                                                                                               |
| <a href="#">CG15800</a>    | <a href="#">ubiquitin-dependent protein catabolic process   inferred from electronic annotation with InterPro:IPR001232, InterPro:IPR016072</a>                                                                             |
| <a href="#">CG30177</a>    | <a href="#">biological process   no biological data available</a>                                                                                                                                                           |
| <a href="#">CG13589</a>    | -                                                                                                                                                                                                                           |
| <a href="#">CG13590</a>    | -                                                                                                                                                                                                                           |
| <a href="#">CG33680</a>    | <a href="#">detection of hormone stimulus   inferred from sequence or structural similarity with InterPro:IPR013053</a>                                                                                                     |
