# Supplementary material for: An Analysis of Genetic Changes during the Divergence of Drosophila Species
Source: PubMed Central journal article supplement (PMC2864749; doi:10.1371/journal.pone.0010485), 2010-05-05
Supplement: pone.0010485.s004.pdf [file pone.0010485.s004.pdf]

| GENE                    | GO BIOLOGICAL PROCESS                                                                                                                                                                                                                                                                                                                                                                                                                                                                                                                                                                                                                                                                                                                                                                                                                                                                                                                                                                                                                                                                                                                                                                                                                                                                                                                                                                                                                                                                                                                                                                                                                                                                                                                                                                                                                                                                                                                                                                                                                   |
|-------------------------|-----------------------------------------------------------------------------------------------------------------------------------------------------------------------------------------------------------------------------------------------------------------------------------------------------------------------------------------------------------------------------------------------------------------------------------------------------------------------------------------------------------------------------------------------------------------------------------------------------------------------------------------------------------------------------------------------------------------------------------------------------------------------------------------------------------------------------------------------------------------------------------------------------------------------------------------------------------------------------------------------------------------------------------------------------------------------------------------------------------------------------------------------------------------------------------------------------------------------------------------------------------------------------------------------------------------------------------------------------------------------------------------------------------------------------------------------------------------------------------------------------------------------------------------------------------------------------------------------------------------------------------------------------------------------------------------------------------------------------------------------------------------------------------------------------------------------------------------------------------------------------------------------------------------------------------------------------------------------------------------------------------------------------------------|
| <a href="#">CG13875</a> | -                                                                                                                                                                                                                                                                                                                                                                                                                                                                                                                                                                                                                                                                                                                                                                                                                                                                                                                                                                                                                                                                                                                                                                                                                                                                                                                                                                                                                                                                                                                                                                                                                                                                                                                                                                                                                                                                                                                                                                                                                                       |
| <a href="#">CG16971</a> | <a href="#">biological process</a>   <a href="#">no biological data available</a>                                                                                                                                                                                                                                                                                                                                                                                                                                                                                                                                                                                                                                                                                                                                                                                                                                                                                                                                                                                                                                                                                                                                                                                                                                                                                                                                                                                                                                                                                                                                                                                                                                                                                                                                                                                                                                                                                                                                                       |
| <a href="#">CG32845</a> | -                                                                                                                                                                                                                                                                                                                                                                                                                                                                                                                                                                                                                                                                                                                                                                                                                                                                                                                                                                                                                                                                                                                                                                                                                                                                                                                                                                                                                                                                                                                                                                                                                                                                                                                                                                                                                                                                                                                                                                                                                                       |
| <a href="#">CG1231</a>  | -                                                                                                                                                                                                                                                                                                                                                                                                                                                                                                                                                                                                                                                                                                                                                                                                                                                                                                                                                                                                                                                                                                                                                                                                                                                                                                                                                                                                                                                                                                                                                                                                                                                                                                                                                                                                                                                                                                                                                                                                                                       |
| <a href="#">CG13884</a> | -                                                                                                                                                                                                                                                                                                                                                                                                                                                                                                                                                                                                                                                                                                                                                                                                                                                                                                                                                                                                                                                                                                                                                                                                                                                                                                                                                                                                                                                                                                                                                                                                                                                                                                                                                                                                                                                                                                                                                                                                                                       |
| <a href="#">CG13896</a> | -                                                                                                                                                                                                                                                                                                                                                                                                                                                                                                                                                                                                                                                                                                                                                                                                                                                                                                                                                                                                                                                                                                                                                                                                                                                                                                                                                                                                                                                                                                                                                                                                                                                                                                                                                                                                                                                                                                                                                                                                                                       |
| <a href="#">CG2199</a>  | -                                                                                                                                                                                                                                                                                                                                                                                                                                                                                                                                                                                                                                                                                                                                                                                                                                                                                                                                                                                                                                                                                                                                                                                                                                                                                                                                                                                                                                                                                                                                                                                                                                                                                                                                                                                                                                                                                                                                                                                                                                       |
| <a href="#">CG32319</a> | <a href="#">protein amino acid acetylation</a>   <a href="#">inferred from sequence or structural similarity with UniProtKB:Q03503</a>                                                                                                                                                                                                                                                                                                                                                                                                                                                                                                                                                                                                                                                                                                                                                                                                                                                                                                                                                                                                                                                                                                                                                                                                                                                                                                                                                                                                                                                                                                                                                                                                                                                                                                                                                                                                                                                                                                  |
| <a href="#">CG13931</a> | -                                                                                                                                                                                                                                                                                                                                                                                                                                                                                                                                                                                                                                                                                                                                                                                                                                                                                                                                                                                                                                                                                                                                                                                                                                                                                                                                                                                                                                                                                                                                                                                                                                                                                                                                                                                                                                                                                                                                                                                                                                       |
| <a href="#">CG12035</a> | -                                                                                                                                                                                                                                                                                                                                                                                                                                                                                                                                                                                                                                                                                                                                                                                                                                                                                                                                                                                                                                                                                                                                                                                                                                                                                                                                                                                                                                                                                                                                                                                                                                                                                                                                                                                                                                                                                                                                                                                                                                       |
| <a href="#">CG11815</a> | -                                                                                                                                                                                                                                                                                                                                                                                                                                                                                                                                                                                                                                                                                                                                                                                                                                                                                                                                                                                                                                                                                                                                                                                                                                                                                                                                                                                                                                                                                                                                                                                                                                                                                                                                                                                                                                                                                                                                                                                                                                       |
| <a href="#">CG32308</a> | <a href="#">biological process</a>   <a href="#">no biological data available</a>                                                                                                                                                                                                                                                                                                                                                                                                                                                                                                                                                                                                                                                                                                                                                                                                                                                                                                                                                                                                                                                                                                                                                                                                                                                                                                                                                                                                                                                                                                                                                                                                                                                                                                                                                                                                                                                                                                                                                       |
| <a href="#">CG10862</a> | <a href="#">regulation of protein metabolic process</a>   <a href="#">inferred from electronic annotation with InterPro:IPR000608</a><br><a href="#">post-translational protein modification</a>   <a href="#">inferred from electronic annotation with InterPro:IPR000608</a>                                                                                                                                                                                                                                                                                                                                                                                                                                                                                                                                                                                                                                                                                                                                                                                                                                                                                                                                                                                                                                                                                                                                                                                                                                                                                                                                                                                                                                                                                                                                                                                                                                                                                                                                                          |
| <a href="#">CG10855</a> | -                                                                                                                                                                                                                                                                                                                                                                                                                                                                                                                                                                                                                                                                                                                                                                                                                                                                                                                                                                                                                                                                                                                                                                                                                                                                                                                                                                                                                                                                                                                                                                                                                                                                                                                                                                                                                                                                                                                                                                                                                                       |
| <a href="#">mge</a>     | <a href="#">intracellular protein transport</a>   <a href="#">inferred from electronic annotation with InterPro:IPR005683</a>                                                                                                                                                                                                                                                                                                                                                                                                                                                                                                                                                                                                                                                                                                                                                                                                                                                                                                                                                                                                                                                                                                                                                                                                                                                                                                                                                                                                                                                                                                                                                                                                                                                                                                                                                                                                                                                                                                           |
| <a href="#">CG10853</a> | -                                                                                                                                                                                                                                                                                                                                                                                                                                                                                                                                                                                                                                                                                                                                                                                                                                                                                                                                                                                                                                                                                                                                                                                                                                                                                                                                                                                                                                                                                                                                                                                                                                                                                                                                                                                                                                                                                                                                                                                                                                       |
| <a href="#">CG14983</a> | -                                                                                                                                                                                                                                                                                                                                                                                                                                                                                                                                                                                                                                                                                                                                                                                                                                                                                                                                                                                                                                                                                                                                                                                                                                                                                                                                                                                                                                                                                                                                                                                                                                                                                                                                                                                                                                                                                                                                                                                                                                       |
| <a href="#">CG32243</a> | <a href="#">biological process</a>   <a href="#">no biological data available</a>                                                                                                                                                                                                                                                                                                                                                                                                                                                                                                                                                                                                                                                                                                                                                                                                                                                                                                                                                                                                                                                                                                                                                                                                                                                                                                                                                                                                                                                                                                                                                                                                                                                                                                                                                                                                                                                                                                                                                       |
| <a href="#">CG32246</a> | <a href="#">transport</a>   <a href="#">inferred from electronic annotation with InterPro:IPR006061</a>                                                                                                                                                                                                                                                                                                                                                                                                                                                                                                                                                                                                                                                                                                                                                                                                                                                                                                                                                                                                                                                                                                                                                                                                                                                                                                                                                                                                                                                                                                                                                                                                                                                                                                                                                                                                                                                                                                                                 |
| <a href="#">CG13717</a> | -                                                                                                                                                                                                                                                                                                                                                                                                                                                                                                                                                                                                                                                                                                                                                                                                                                                                                                                                                                                                                                                                                                                                                                                                                                                                                                                                                                                                                                                                                                                                                                                                                                                                                                                                                                                                                                                                                                                                                                                                                                       |
| <a href="#">CG13716</a> | <a href="#">regulation of localization</a>   <a href="#">inferred from sequence or structural similarity with halo</a>                                                                                                                                                                                                                                                                                                                                                                                                                                                                                                                                                                                                                                                                                                                                                                                                                                                                                                                                                                                                                                                                                                                                                                                                                                                                                                                                                                                                                                                                                                                                                                                                                                                                                                                                                                                                                                                                                                                  |
| <a href="#">CG32232</a> | <a href="#">microtubule cytoskeleton organization</a>   <a href="#">inferred from electronic annotation with InterPro:IPR007259</a>                                                                                                                                                                                                                                                                                                                                                                                                                                                                                                                                                                                                                                                                                                                                                                                                                                                                                                                                                                                                                                                                                                                                                                                                                                                                                                                                                                                                                                                                                                                                                                                                                                                                                                                                                                                                                                                                                                     |
| <a href="#">CG10478</a> | <a href="#">protein import into nucleus</a>   <a href="#">inferred from sequence or structural similarity with HGNC_gene:KPNA4: HGNC:6397: OMIM:6029702</a>                                                                                                                                                                                                                                                                                                                                                                                                                                                                                                                                                                                                                                                                                                                                                                                                                                                                                                                                                                                                                                                                                                                                                                                                                                                                                                                                                                                                                                                                                                                                                                                                                                                                                                                                                                                                                                                                             |
| <a href="#">l(3)mbn</a> | <a href="#">plasmacyte differentiation</a>   <a href="#">non-traceable author statement</a>                                                                                                                                                                                                                                                                                                                                                                                                                                                                                                                                                                                                                                                                                                                                                                                                                                                                                                                                                                                                                                                                                                                                                                                                                                                                                                                                                                                                                                                                                                                                                                                                                                                                                                                                                                                                                                                                                                                                             |
| <a href="#">Acp65Aa</a> | -                                                                                                                                                                                                                                                                                                                                                                                                                                                                                                                                                                                                                                                                                                                                                                                                                                                                                                                                                                                                                                                                                                                                                                                                                                                                                                                                                                                                                                                                                                                                                                                                                                                                                                                                                                                                                                                                                                                                                                                                                                       |
| <a href="#">CG13297</a> | -                                                                                                                                                                                                                                                                                                                                                                                                                                                                                                                                                                                                                                                                                                                                                                                                                                                                                                                                                                                                                                                                                                                                                                                                                                                                                                                                                                                                                                                                                                                                                                                                                                                                                                                                                                                                                                                                                                                                                                                                                                       |
| <a href="#">CG7386</a>  | -                                                                                                                                                                                                                                                                                                                                                                                                                                                                                                                                                                                                                                                                                                                                                                                                                                                                                                                                                                                                                                                                                                                                                                                                                                                                                                                                                                                                                                                                                                                                                                                                                                                                                                                                                                                                                                                                                                                                                                                                                                       |
| <a href="#">CG14835</a> | -                                                                                                                                                                                                                                                                                                                                                                                                                                                                                                                                                                                                                                                                                                                                                                                                                                                                                                                                                                                                                                                                                                                                                                                                                                                                                                                                                                                                                                                                                                                                                                                                                                                                                                                                                                                                                                                                                                                                                                                                                                       |
| <a href="#">sphinx2</a> | <a href="#">innate immune response</a>   <a href="#">inferred from mutant phenotype</a><br><a href="#">defense response to Gram-positive bacterium</a>   <a href="#">inferred from mutant phenotype</a><br><a href="#">defense response to Gram-negative bacterium</a>   <a href="#">inferred from mutant phenotype</a><br><a href="#">defense response to fungus</a>   <a href="#">inferred from mutant phenotype</a><br><a href="#">positive regulation of Toll signaling pathway</a>   <a href="#">inferred from mutant phenotype</a><br><a href="#">proteolysis</a>   <a href="#">inferred from electronic annotation with InterPro:IPR001254</a>                                                                                                                                                                                                                                                                                                                                                                                                                                                                                                                                                                                                                                                                                                                                                                                                                                                                                                                                                                                                                                                                                                                                                                                                                                                                                                                                                                                   |
| <a href="#">CG7526</a>  | -                                                                                                                                                                                                                                                                                                                                                                                                                                                                                                                                                                                                                                                                                                                                                                                                                                                                                                                                                                                                                                                                                                                                                                                                                                                                                                                                                                                                                                                                                                                                                                                                                                                                                                                                                                                                                                                                                                                                                                                                                                       |
| <a href="#">CG32371</a> | -                                                                                                                                                                                                                                                                                                                                                                                                                                                                                                                                                                                                                                                                                                                                                                                                                                                                                                                                                                                                                                                                                                                                                                                                                                                                                                                                                                                                                                                                                                                                                                                                                                                                                                                                                                                                                                                                                                                                                                                                                                       |
| <a href="#">CG7213</a>  | -                                                                                                                                                                                                                                                                                                                                                                                                                                                                                                                                                                                                                                                                                                                                                                                                                                                                                                                                                                                                                                                                                                                                                                                                                                                                                                                                                                                                                                                                                                                                                                                                                                                                                                                                                                                                                                                                                                                                                                                                                                       |
| <a href="#">PGRP-LF</a> | <a href="#">defense response</a>   <a href="#">non-traceable author statement</a><br><a href="#">innate immune response</a>   <a href="#">non-traceable author statement</a><br><a href="#">peptidoglycan catabolic process</a>   <a href="#">non-traceable author statement</a>                                                                                                                                                                                                                                                                                                                                                                                                                                                                                                                                                                                                                                                                                                                                                                                                                                                                                                                                                                                                                                                                                                                                                                                                                                                                                                                                                                                                                                                                                                                                                                                                                                                                                                                                                        |
| <a href="#">CG16719</a> | <a href="#">mesoderm development</a>   <a href="#">non-traceable author statement</a>                                                                                                                                                                                                                                                                                                                                                                                                                                                                                                                                                                                                                                                                                                                                                                                                                                                                                                                                                                                                                                                                                                                                                                                                                                                                                                                                                                                                                                                                                                                                                                                                                                                                                                                                                                                                                                                                                                                                                   |
| <a href="#">CG14164</a> | -                                                                                                                                                                                                                                                                                                                                                                                                                                                                                                                                                                                                                                                                                                                                                                                                                                                                                                                                                                                                                                                                                                                                                                                                                                                                                                                                                                                                                                                                                                                                                                                                                                                                                                                                                                                                                                                                                                                                                                                                                                       |
| <a href="#">Nc</a>      | <a href="#">head involution</a>   <a href="#">inferred from mutant phenotype</a><br><a href="#">apoptosis</a>   <a href="#">inferred from mutant phenotype</a><br><a href="#">hemocyte development</a>   <a href="#">inferred from mutant phenotype</a><br><a href="#">compound eye development</a>   <a href="#">inferred from mutant phenotype</a><br><a href="#">central nervous system development</a>   <a href="#">inferred from mutant phenotype</a><br><a href="#">autophagic cell death</a>   <a href="#">inferred from expression pattern</a><br><a href="#">salivary gland cell autophagic cell death</a>   <a href="#">inferred from expression pattern</a><br><a href="#">apoptotic program</a>   <a href="#">inferred from expression pattern AND inferred from mutant phenotype</a><br><a href="#">induction of programmed cell death by hormones</a>   <a href="#">traceable author statement</a><br><a href="#">embryonic development via the syncytial blastoderm</a>   <a href="#">non-traceable author statement</a><br><a href="#">regulation of retinal cell programmed cell death</a>   <a href="#">non-traceable author statement</a><br><a href="#">sperm individualization</a>   <a href="#">inferred from mutant phenotype</a><br><a href="#">sensory organ development</a>   <a href="#">inferred from mutant phenotype</a><br><a href="#">metamorphosis</a>   <a href="#">traceable author statement</a><br><a href="#">determination of adult life span</a>   <a href="#">inferred from mutant phenotype</a><br><a href="#">protein autoprocessing</a>   <a href="#">inferred from direct assay</a><br><a href="#">zymogen activation</a>   <a href="#">inferred from direct assay inferred from mutant phenotype</a><br><a href="#">caspase activation</a>   <a href="#">inferred from mutant phenotype</a><br><a href="#">proteolysis</a>   <a href="#">inferred from electronic annotation with InterPro:IPR001309, InterPro:IPR002138, InterPro:IPR002398, InterPro:IPR011600, InterPro:IPR016129</a> |
| <a href="#">CG6527</a>  | -                                                                                                                                                                                                                                                                                                                                                                                                                                                                                                                                                                                                                                                                                                                                                                                                                                                                                                                                                                                                                                                                                                                                                                                                                                                                                                                                                                                                                                                                                                                                                                                                                                                                                                                                                                                                                                                                                                                                                                                                                                       |
| <a href="#">CG6185</a>  | -                                                                                                                                                                                                                                                                                                                                                                                                                                                                                                                                                                                                                                                                                                                                                                                                                                                                                                                                                                                                                                                                                                                                                                                                                                                                                                                                                                                                                                                                                                                                                                                                                                                                                                                                                                                                                                                                                                                                                                                                                                       |
| <a href="#">CG6168</a>  | <a href="#">proteolysis</a>   <a href="#">inferred from sequence or structural similarity</a><br><a href="#">defense response to Gram-negative bacterium</a>   <a href="#">inferred from mutant phenotype</a>                                                                                                                                                                                                                                                                                                                                                                                                                                                                                                                                                                                                                                                                                                                                                                                                                                                                                                                                                                                                                                                                                                                                                                                                                                                                                                                                                                                                                                                                                                                                                                                                                                                                                                                                                                                                                           |
| <a href="#">CG11714</a> | -                                                                                                                                                                                                                                                                                                                                                                                                                                                                                                                                                                                                                                                                                                                                                                                                                                                                                                                                                                                                                                                                                                                                                                                                                                                                                                                                                                                                                                                                                                                                                                                                                                                                                                                                                                                                                                                                                                                                                                                                                                       |
| <a href="#">CG11570</a> | -                                                                                                                                                                                                                                                                                                                                                                                                                                                                                                                                                                                                                                                                                                                                                                                                                                                                                                                                                                                                                                                                                                                                                                                                                                                                                                                                                                                                                                                                                                                                                                                                                                                                                                                                                                                                                                                                                                                                                                                                                                       |

|                          |                                                                                                                                                                                                                                                                                                                                                                                 |
|--------------------------|---------------------------------------------------------------------------------------------------------------------------------------------------------------------------------------------------------------------------------------------------------------------------------------------------------------------------------------------------------------------------------|
| <a href="#">CG17154</a>  | -                                                                                                                                                                                                                                                                                                                                                                               |
| <a href="#">CG17666</a>  | -                                                                                                                                                                                                                                                                                                                                                                               |
| <a href="#">CG32110</a>  | <a href="#">proteolysis</a>   <a href="#">inferred from sequence or structural similarity with UniProtKB:Q9P0U3</a>                                                                                                                                                                                                                                                             |
| <a href="#">CG32135</a>  | <a href="#">mRNA export from nucleus</a>   <a href="#">inferred from sequence or structural similarity with UniProtKB:O88984</a>                                                                                                                                                                                                                                                |
| <a href="#">CG17359</a>  | -                                                                                                                                                                                                                                                                                                                                                                               |
| <a href="#">CG32141</a>  | <a href="#">biological process</a>   <a href="#">no biological data available</a>                                                                                                                                                                                                                                                                                               |
| <a href="#">CG13482</a>  | -                                                                                                                                                                                                                                                                                                                                                                               |
| <a href="#">CG3919</a>   | -                                                                                                                                                                                                                                                                                                                                                                               |
| <a href="#">CG13476</a>  | -                                                                                                                                                                                                                                                                                                                                                                               |
| <a href="#">CG18581</a>  | -                                                                                                                                                                                                                                                                                                                                                                               |
| <a href="#">CG13463</a>  | -                                                                                                                                                                                                                                                                                                                                                                               |
| <a href="#">CG13460</a>  | -                                                                                                                                                                                                                                                                                                                                                                               |
| <a href="#">ran-like</a> | <a href="#">intracellular protein transport</a>   <a href="#">inferred from electronic annotation with InterPro:IPR002041</a><br><a href="#">signal transduction</a>   <a href="#">inferred from electronic annotation with InterPro:IPR002041</a><br><a href="#">nucleocytoplasmic transport</a>   <a href="#">inferred from electronic annotation with InterPro:IPR002041</a> |
| <a href="#">Eiq71Ed</a>  | <a href="#">autophagic cell death</a>   <a href="#">inferred from expression pattern</a><br><a href="#">salivary gland cell autophagic cell death</a>   <a href="#">inferred from expression pattern</a>                                                                                                                                                                        |
| <a href="#">CG33690</a>  | <a href="#">biological process</a>   <a href="#">no biological data available</a>                                                                                                                                                                                                                                                                                               |
| <a href="#">CG13732</a>  | -                                                                                                                                                                                                                                                                                                                                                                               |
| <a href="#">CG4306</a>   | -                                                                                                                                                                                                                                                                                                                                                                               |
| <a href="#">CG34254</a>  | -                                                                                                                                                                                                                                                                                                                                                                               |
| <a href="#">CG14089</a>  | -                                                                                                                                                                                                                                                                                                                                                                               |
| <a href="#">825-Oak</a>  | <a href="#">biological process</a>   <a href="#">no biological data available</a>                                                                                                                                                                                                                                                                                               |
| <a href="#">CG33710</a>  | <a href="#">biological process</a>   <a href="#">no biological data available</a>                                                                                                                                                                                                                                                                                               |
| <a href="#">schuy</a>    | -                                                                                                                                                                                                                                                                                                                                                                               |
| <a href="#">CG7298</a>   | <a href="#">chitin metabolic process</a>   <a href="#">inferred from electronic annotation with InterPro:IPR002557</a>                                                                                                                                                                                                                                                          |
| <a href="#">CG6951</a>   | -                                                                                                                                                                                                                                                                                                                                                                               |
| <a href="#">CG11451</a>  | <a href="#">mitotic spindle organization</a>   <a href="#">inferred from mutant phenotype</a>                                                                                                                                                                                                                                                                                   |
| <a href="#">CG12984</a>  | -                                                                                                                                                                                                                                                                                                                                                                               |
| <a href="#">CG7370</a>   | -                                                                                                                                                                                                                                                                                                                                                                               |
| <a href="#">CG7145</a>   | <a href="#">proline metabolic process</a>   <a href="#">inferred from sequence or structural similarity with UniProtKB:P30038</a><br><a href="#">proline biosynthetic process</a>   <a href="#">inferred from electronic annotation with InterPro:IPR005931</a>                                                                                                                 |
| <a href="#">CG15374</a>  | -                                                                                                                                                                                                                                                                                                                                                                               |
| <a href="#">CG11404</a>  | -                                                                                                                                                                                                                                                                                                                                                                               |
| <a href="#">CG14453</a>  | -                                                                                                                                                                                                                                                                                                                                                                               |
| <a href="#">CG14451</a>  | -                                                                                                                                                                                                                                                                                                                                                                               |
| <a href="#">CG32461</a>  | <a href="#">biological process</a>   <a href="#">no biological data available</a>                                                                                                                                                                                                                                                                                               |
| <a href="#">CG40294</a>  | -                                                                                                                                                                                                                                                                                                                                                                               |
