# Supplementary material for: An Analysis of Genetic Changes during the Divergence of Drosophila Species
Source: PubMed Central journal article supplement (PMC2864749; doi:10.1371/journal.pone.0010485), 2010-05-05
Supplement: pone.0010485.s005.pdf [file pone.0010485.s005.pdf]

| GENE      | GO BIOLOGICAL PROCESS                                                                                                                                                                                                                                                                                                                                                                                                                                                                                                                                                                                                                                                                                                                                                                                                                                                                                                                                                                                                                                                                                                                                 |
|-----------|-------------------------------------------------------------------------------------------------------------------------------------------------------------------------------------------------------------------------------------------------------------------------------------------------------------------------------------------------------------------------------------------------------------------------------------------------------------------------------------------------------------------------------------------------------------------------------------------------------------------------------------------------------------------------------------------------------------------------------------------------------------------------------------------------------------------------------------------------------------------------------------------------------------------------------------------------------------------------------------------------------------------------------------------------------------------------------------------------------------------------------------------------------|
| CG31516   | biological process   no biological data available                                                                                                                                                                                                                                                                                                                                                                                                                                                                                                                                                                                                                                                                                                                                                                                                                                                                                                                                                                                                                                                                                                     |
| CG14639   | .                                                                                                                                                                                                                                                                                                                                                                                                                                                                                                                                                                                                                                                                                                                                                                                                                                                                                                                                                                                                                                                                                                                                                     |
| CG41461   | .                                                                                                                                                                                                                                                                                                                                                                                                                                                                                                                                                                                                                                                                                                                                                                                                                                                                                                                                                                                                                                                                                                                                                     |
| CG41468   | .                                                                                                                                                                                                                                                                                                                                                                                                                                                                                                                                                                                                                                                                                                                                                                                                                                                                                                                                                                                                                                                                                                                                                     |
| CG31525   | biological process   no biological data available                                                                                                                                                                                                                                                                                                                                                                                                                                                                                                                                                                                                                                                                                                                                                                                                                                                                                                                                                                                                                                                                                                     |
| CG31526   | biological process   no biological data available                                                                                                                                                                                                                                                                                                                                                                                                                                                                                                                                                                                                                                                                                                                                                                                                                                                                                                                                                                                                                                                                                                     |
| CG41516   | .                                                                                                                                                                                                                                                                                                                                                                                                                                                                                                                                                                                                                                                                                                                                                                                                                                                                                                                                                                                                                                                                                                                                                     |
| CG14659   | .                                                                                                                                                                                                                                                                                                                                                                                                                                                                                                                                                                                                                                                                                                                                                                                                                                                                                                                                                                                                                                                                                                                                                     |
| CG14662   | .                                                                                                                                                                                                                                                                                                                                                                                                                                                                                                                                                                                                                                                                                                                                                                                                                                                                                                                                                                                                                                                                                                                                                     |
| CG12590   | .                                                                                                                                                                                                                                                                                                                                                                                                                                                                                                                                                                                                                                                                                                                                                                                                                                                                                                                                                                                                                                                                                                                                                     |
| CG12161   | ubiquitin-dependent protein catabolic process   inferred from electronic annotation with InterPro:IPR000243, InterPro:IPR001353                                                                                                                                                                                                                                                                                                                                                                                                                                                                                                                                                                                                                                                                                                                                                                                                                                                                                                                                                                                                                       |
| mia       | transcription initiation from RNA polymerase II promoter   inferred from sequence or structural similarity with HGNC_gene:TAF6L; HGNC:17305; OMIM:602946 AND inferred from sequence or structural similarity with SGD_LOCUS:TAF60; SGD:S0003080<br>male meiosis I   inferred from mutant phenotype<br>spermatogenesis   inferred from mutant phenotype<br>meiosis I traceable author statement<br>spermatid development   traceable author statement<br>regulation of transcription factor activity   inferred from electronic annotation with InterPro:IPR011442                                                                                                                                                                                                                                                                                                                                                                                                                                                                                                                                                                                     |
| CG31554   | biological process   no biological data available                                                                                                                                                                                                                                                                                                                                                                                                                                                                                                                                                                                                                                                                                                                                                                                                                                                                                                                                                                                                                                                                                                     |
| CG1075    | proteolysis   inferred from electronic annotation with InterPro:IPR000668                                                                                                                                                                                                                                                                                                                                                                                                                                                                                                                                                                                                                                                                                                                                                                                                                                                                                                                                                                                                                                                                             |
| CG15185   | .                                                                                                                                                                                                                                                                                                                                                                                                                                                                                                                                                                                                                                                                                                                                                                                                                                                                                                                                                                                                                                                                                                                                                     |
| CG1138    | .                                                                                                                                                                                                                                                                                                                                                                                                                                                                                                                                                                                                                                                                                                                                                                                                                                                                                                                                                                                                                                                                                                                                                     |
| nx14      | RNA export from nucleus   inferred from sequence or structural similarity with NCBI_NP:071336                                                                                                                                                                                                                                                                                                                                                                                                                                                                                                                                                                                                                                                                                                                                                                                                                                                                                                                                                                                                                                                         |
| Mst84Dd   | .                                                                                                                                                                                                                                                                                                                                                                                                                                                                                                                                                                                                                                                                                                                                                                                                                                                                                                                                                                                                                                                                                                                                                     |
| CG11977   | .                                                                                                                                                                                                                                                                                                                                                                                                                                                                                                                                                                                                                                                                                                                                                                                                                                                                                                                                                                                                                                                                                                                                                     |
| CG33630   | biological process   no biological data available                                                                                                                                                                                                                                                                                                                                                                                                                                                                                                                                                                                                                                                                                                                                                                                                                                                                                                                                                                                                                                                                                                     |
| CG34108   | biological process   no biological data available                                                                                                                                                                                                                                                                                                                                                                                                                                                                                                                                                                                                                                                                                                                                                                                                                                                                                                                                                                                                                                                                                                     |
| CG14694   | transport   inferred from electronic annotation with InterPro:IPR002666                                                                                                                                                                                                                                                                                                                                                                                                                                                                                                                                                                                                                                                                                                                                                                                                                                                                                                                                                                                                                                                                               |
| CG14708   | .                                                                                                                                                                                                                                                                                                                                                                                                                                                                                                                                                                                                                                                                                                                                                                                                                                                                                                                                                                                                                                                                                                                                                     |
| ht        | negative regulation of protein amino acid dephosphorylation   inferred from direct assay                                                                                                                                                                                                                                                                                                                                                                                                                                                                                                                                                                                                                                                                                                                                                                                                                                                                                                                                                                                                                                                              |
| CG10013   | .                                                                                                                                                                                                                                                                                                                                                                                                                                                                                                                                                                                                                                                                                                                                                                                                                                                                                                                                                                                                                                                                                                                                                     |
| CG10096   | metabolic process   inferred from electronic annotation with InterPro:IPR016040                                                                                                                                                                                                                                                                                                                                                                                                                                                                                                                                                                                                                                                                                                                                                                                                                                                                                                                                                                                                                                                                       |
| CG17207   | biological process   no biological data available                                                                                                                                                                                                                                                                                                                                                                                                                                                                                                                                                                                                                                                                                                                                                                                                                                                                                                                                                                                                                                                                                                     |
| CG33929   | biological process   no biological data available                                                                                                                                                                                                                                                                                                                                                                                                                                                                                                                                                                                                                                                                                                                                                                                                                                                                                                                                                                                                                                                                                                     |
| CG10909   | RNA processing   inferred from sequence or structural similarity with SGD_LOCUS:NOP1; SGD:S0002172                                                                                                                                                                                                                                                                                                                                                                                                                                                                                                                                                                                                                                                                                                                                                                                                                                                                                                                                                                                                                                                    |
| CG14394   | .                                                                                                                                                                                                                                                                                                                                                                                                                                                                                                                                                                                                                                                                                                                                                                                                                                                                                                                                                                                                                                                                                                                                                     |
| CG14370   | .                                                                                                                                                                                                                                                                                                                                                                                                                                                                                                                                                                                                                                                                                                                                                                                                                                                                                                                                                                                                                                                                                                                                                     |
| CG14369   | .                                                                                                                                                                                                                                                                                                                                                                                                                                                                                                                                                                                                                                                                                                                                                                                                                                                                                                                                                                                                                                                                                                                                                     |
| CG9929    | .                                                                                                                                                                                                                                                                                                                                                                                                                                                                                                                                                                                                                                                                                                                                                                                                                                                                                                                                                                                                                                                                                                                                                     |
| CG14357   | .                                                                                                                                                                                                                                                                                                                                                                                                                                                                                                                                                                                                                                                                                                                                                                                                                                                                                                                                                                                                                                                                                                                                                     |
| CG9616    | .                                                                                                                                                                                                                                                                                                                                                                                                                                                                                                                                                                                                                                                                                                                                                                                                                                                                                                                                                                                                                                                                                                                                                     |
| CG14851   | .                                                                                                                                                                                                                                                                                                                                                                                                                                                                                                                                                                                                                                                                                                                                                                                                                                                                                                                                                                                                                                                                                                                                                     |
| FK506-bp1 | protein folding   inferred from sequence or structural similarity with UniProtKB:Q26486                                                                                                                                                                                                                                                                                                                                                                                                                                                                                                                                                                                                                                                                                                                                                                                                                                                                                                                                                                                                                                                               |
| CG5399    | .                                                                                                                                                                                                                                                                                                                                                                                                                                                                                                                                                                                                                                                                                                                                                                                                                                                                                                                                                                                                                                                                                                                                                     |
| CG34274   | .                                                                                                                                                                                                                                                                                                                                                                                                                                                                                                                                                                                                                                                                                                                                                                                                                                                                                                                                                                                                                                                                                                                                                     |
| CG12784   | .                                                                                                                                                                                                                                                                                                                                                                                                                                                                                                                                                                                                                                                                                                                                                                                                                                                                                                                                                                                                                                                                                                                                                     |
| CG5614    | .                                                                                                                                                                                                                                                                                                                                                                                                                                                                                                                                                                                                                                                                                                                                                                                                                                                                                                                                                                                                                                                                                                                                                     |
| ird5      | positive regulation of antibacterial peptide biosynthetic process   inferred from mutant phenotype<br>protein catabolic process   inferred from direct assay<br>protein amino acid phosphorylation   non-traceable author statement<br>Toll signaling pathway   traceable author statement<br>dorsal/ventral axis specification   non-traceable author statement<br>antibacterial humoral response   inferred from mutant phenotype<br>antimicrobial humoral response   non-traceable author statement<br>protein folding   inferred from electronic annotation with InterPro:IPR004127                                                                                                                                                                                                                                                                                                                                                                                                                                                                                                                                                               |
| CG31287   | protein folding   inferred from electronic annotation with InterPro:IPR004127                                                                                                                                                                                                                                                                                                                                                                                                                                                                                                                                                                                                                                                                                                                                                                                                                                                                                                                                                                                                                                                                         |
| Mst89B    | .                                                                                                                                                                                                                                                                                                                                                                                                                                                                                                                                                                                                                                                                                                                                                                                                                                                                                                                                                                                                                                                                                                                                                     |
| CG17930   | transport   inferred from electronic annotation with InterPro:IPR005828                                                                                                                                                                                                                                                                                                                                                                                                                                                                                                                                                                                                                                                                                                                                                                                                                                                                                                                                                                                                                                                                               |
| CG10317   | .                                                                                                                                                                                                                                                                                                                                                                                                                                                                                                                                                                                                                                                                                                                                                                                                                                                                                                                                                                                                                                                                                                                                                     |
| Actn3     | actin filament bundle formation   inferred from sequence or structural similarity with EMBL:AF093775                                                                                                                                                                                                                                                                                                                                                                                                                                                                                                                                                                                                                                                                                                                                                                                                                                                                                                                                                                                                                                                  |
| CG5866    | .                                                                                                                                                                                                                                                                                                                                                                                                                                                                                                                                                                                                                                                                                                                                                                                                                                                                                                                                                                                                                                                                                                                                                     |
| Sns5      | pupal adhesion   traceable author statement                                                                                                                                                                                                                                                                                                                                                                                                                                                                                                                                                                                                                                                                                                                                                                                                                                                                                                                                                                                                                                                                                                           |
| CG34281   | .                                                                                                                                                                                                                                                                                                                                                                                                                                                                                                                                                                                                                                                                                                                                                                                                                                                                                                                                                                                                                                                                                                                                                     |
| CG14315   | .                                                                                                                                                                                                                                                                                                                                                                                                                                                                                                                                                                                                                                                                                                                                                                                                                                                                                                                                                                                                                                                                                                                                                     |
| CG14313   | .                                                                                                                                                                                                                                                                                                                                                                                                                                                                                                                                                                                                                                                                                                                                                                                                                                                                                                                                                                                                                                                                                                                                                     |
| CG7669    | .                                                                                                                                                                                                                                                                                                                                                                                                                                                                                                                                                                                                                                                                                                                                                                                                                                                                                                                                                                                                                                                                                                                                                     |
| CG14306   | .                                                                                                                                                                                                                                                                                                                                                                                                                                                                                                                                                                                                                                                                                                                                                                                                                                                                                                                                                                                                                                                                                                                                                     |
| CG4538    | ATP-dependent proteolysis   inferred from sequence or structural similarity with UniProtKB:O76031<br>protein transport   inferred from electronic annotation with InterPro:IPR004487                                                                                                                                                                                                                                                                                                                                                                                                                                                                                                                                                                                                                                                                                                                                                                                                                                                                                                                                                                  |
| Pros28.1A | ubiquitin-dependent protein catabolic process   inferred from electronic annotation with InterPro:IPR000426, InterPro:IPR001353                                                                                                                                                                                                                                                                                                                                                                                                                                                                                                                                                                                                                                                                                                                                                                                                                                                                                                                                                                                                                       |
| TotC      | response to stress   inferred from sequence or structural similarity with TotA                                                                                                                                                                                                                                                                                                                                                                                                                                                                                                                                                                                                                                                                                                                                                                                                                                                                                                                                                                                                                                                                        |
| CheB93b   | .                                                                                                                                                                                                                                                                                                                                                                                                                                                                                                                                                                                                                                                                                                                                                                                                                                                                                                                                                                                                                                                                                                                                                     |
| CG6690    | oxidation reduction   inferred from electronic annotation with InterPro:IPR006863<br>cell redox homeostasis   inferred from electronic annotation with InterPro:IPR013766, InterPro:IPR017936                                                                                                                                                                                                                                                                                                                                                                                                                                                                                                                                                                                                                                                                                                                                                                                                                                                                                                                                                         |
| BG4       | defense response   non-traceable author statement<br>signal transduction   non-traceable author statement<br>immune response   inferred from mutant phenotype<br>apoptosis   non-traceable author statement<br>sperm individualization   inferred from mutant phenotype<br>defense response to Gram-negative bacterium   traceable author statement<br>positive regulation of antibacterial peptide biosynthetic process   traceable author statement                                                                                                                                                                                                                                                                                                                                                                                                                                                                                                                                                                                                                                                                                                 |
| CG17625   | .                                                                                                                                                                                                                                                                                                                                                                                                                                                                                                                                                                                                                                                                                                                                                                                                                                                                                                                                                                                                                                                                                                                                                     |
| CG31281   | .                                                                                                                                                                                                                                                                                                                                                                                                                                                                                                                                                                                                                                                                                                                                                                                                                                                                                                                                                                                                                                                                                                                                                     |
| p53       | DNA damage response, signal transduction by p53 class mediator   traceable author statement<br>DNA damage response, signal transduction resulting in induction of apoptosis   traceable author statement<br>apoptosis   traceable author statement<br>cell death   inferred from mutant phenotype<br>response to radiation   inferred from mutant phenotype<br>DNA damage response, signal transduction by p53 class mediator resulting in induction of apoptosis   inferred from mutant phenotype<br>response to DNA damage stimulus   inferred from mutant phenotype<br>regulation of transcription from RNA polymerase II promoter   traceable author statement<br>determination of adult life span   inferred from mutant phenotype<br>issue regeneration   inferred from mutant phenotype<br>response to UV   inferred from mutant phenotype<br>caspase activation   inferred from mutant phenotype<br>response to ionizing radiation   inferred from mutant phenotype<br>positive regulation of gene-specific transcription   inferred from mutant phenotype<br>positive regulation of cell cycle   inferred from genetic interaction with CoVa |
| CG31457   | .                                                                                                                                                                                                                                                                                                                                                                                                                                                                                                                                                                                                                                                                                                                                                                                                                                                                                                                                                                                                                                                                                                                                                     |
| CG31515   | .                                                                                                                                                                                                                                                                                                                                                                                                                                                                                                                                                                                                                                                                                                                                                                                                                                                                                                                                                                                                                                                                                                                                                     |
| CG10177   | protein amino acid phosphorylation   non-traceable author statement<br>intracellular signaling cascade   inferred from electronic annotation with InterPro:IPR003533                                                                                                                                                                                                                                                                                                                                                                                                                                                                                                                                                                                                                                                                                                                                                                                                                                                                                                                                                                                  |
| CG10164   | .                                                                                                                                                                                                                                                                                                                                                                                                                                                                                                                                                                                                                                                                                                                                                                                                                                                                                                                                                                                                                                                                                                                                                     |
| CG16710   | proteolysis   non-traceable author statement                                                                                                                                                                                                                                                                                                                                                                                                                                                                                                                                                                                                                                                                                                                                                                                                                                                                                                                                                                                                                                                                                                          |
| CG18754   | proteolysis   non-traceable author statement                                                                                                                                                                                                                                                                                                                                                                                                                                                                                                                                                                                                                                                                                                                                                                                                                                                                                                                                                                                                                                                                                                          |
| CG10254   | regulation of protein metabolic process   inferred from electronic annotation with InterPro:IPR000608<br>post-translational protein modification   inferred from electronic annotation with InterPro:IPR000608                                                                                                                                                                                                                                                                                                                                                                                                                                                                                                                                                                                                                                                                                                                                                                                                                                                                                                                                        |
| gav       | telomere capping   inferred from expression pattern<br>telomere maintenance   inferred from mutant phenotype                                                                                                                                                                                                                                                                                                                                                                                                                                                                                                                                                                                                                                                                                                                                                                                                                                                                                                                                                                                                                                          |
| CG31128   | biological process   no biological data available                                                                                                                                                                                                                                                                                                                                                                                                                                                                                                                                                                                                                                                                                                                                                                                                                                                                                                                                                                                                                                                                                                     |
| bam       | gamete generation   inferred from mutant phenotype                                                                                                                                                                                                                                                                                                                                                                                                                                                                                                                                                                                                                                                                                                                                                                                                                                                                                                                                                                                                                                                                                                    |

|             |                                                                                                                                                                 |
|-------------|-----------------------------------------------------------------------------------------------------------------------------------------------------------------|
|             | <a href="#">cystoblast division</a>   <a href="#">inferred from mutant phenotype</a>                                                                            |
|             | <a href="#">fusome organization</a>   <a href="#">inferred from mutant phenotype</a>                                                                            |
|             | <a href="#">spermatogenesis</a>   <a href="#">traceable author statement</a>                                                                                    |
|             | <a href="#">germ-line stem cell division</a>   <a href="#">inferred from mutant phenotype</a>                                                                   |
|             | <a href="#">germanium-derived female germ-line cyst formation</a>   <a href="#">inferred from mutant phenotype</a>                                              |
|             | <a href="#">cell fate specification</a>   <a href="#">traceable author statement</a>                                                                            |
|             | <a href="#">germ cell development</a>   <a href="#">traceable author statement</a>                                                                              |
|             | <a href="#">male meiosis</a>   <a href="#">traceable author statement</a>                                                                                       |
|             | <a href="#">female germ-line cyst formation</a>   <a href="#">traceable author statement</a>                                                                    |
|             | <a href="#">cell fate determination</a>   <a href="#">traceable author statement</a>                                                                            |
|             | <a href="#">spectrosome organization</a>   <a href="#">traceable author statement</a>                                                                           |
|             | <a href="#">spermatogonial cell division</a>   <a href="#">traceable author statement</a>                                                                       |
|             | <a href="#">vesicle targeting to fusome</a>   <a href="#">traceable author statement</a>                                                                        |
|             | <a href="#">oogenesis</a>   <a href="#">inferred from mutant phenotype</a>                                                                                      |
| CG11889     | -                                                                                                                                                               |
| BG642167    | -                                                                                                                                                               |
| Mat57Db     | <a href="#">oviposition</a>   <a href="#">non-traceable author statement</a>                                                                                    |
|             | <a href="#">post-mating behavior</a>   <a href="#">non-traceable author statement</a>                                                                           |
| CG14545     | -                                                                                                                                                               |
| CG34130     | <a href="#">biological process</a>   <a href="#">no biological data available</a>                                                                               |
| CG14244     | -                                                                                                                                                               |
| CG14262     | -                                                                                                                                                               |
| CG5402      | -                                                                                                                                                               |
| CG12879     | -                                                                                                                                                               |
| Acp98AB     | <a href="#">negative regulation of female receptivity, post-mating</a>   <a href="#">non-traceable author statement</a>                                         |
| CG33213     | <a href="#">biological process</a>   <a href="#">no biological data available</a>                                                                               |
| CG5527      | <a href="#">proteolysis</a>   <a href="#">inferred from electronic annotation with InterPro:IPR000718, InterPro:IPR008753, InterPro:IPR018497</a>               |
| CG34436     | -                                                                                                                                                               |
| CG15510     | -                                                                                                                                                               |
| Jon99Fi     | <a href="#">proteolysis</a>   <a href="#">inferred from electronic annotation with InterPro:IPR001254, InterPro:IPR001314, InterPro:IPR018114</a>               |
| CG2267      | -                                                                                                                                                               |
| CG31013     | <a href="#">protein metabolic process</a>   <a href="#">inferred from electronic annotation with InterPro:IPR006620</a>                                         |
|             | <a href="#">oxidation reduction</a>   <a href="#">inferred from electronic annotation with InterPro:IPR013547</a>                                               |
| CG1340      | <a href="#">translational initiation</a>   <a href="#">inferred from sequence or structural similarity</a>                                                      |
| CG31008     | -                                                                                                                                                               |
| Prosalpha3T | <a href="#">ubiquitin-dependent protein catabolic process</a>   <a href="#">inferred from electronic annotation with InterPro:IPR000426, InterPro:IPR001353</a> |
| CG18672     | <a href="#">one-carbon compound metabolic process</a>   <a href="#">inferred from electronic annotation with InterPro:IPR018338</a>                             |
| CG1792      | -                                                                                                                                                               |
